# Supplementary material
Source: PubMed Central journal article supplement (PMC4139101)
Supplement: NIHMS546503-supplement-125_2013_3121_MOESM2_ESM.pdf [file NIHMS546503-supplement-125_2013_3121_MOESM2_ESM.pdf]

Electronic Supplementary Table 1: Baseline and follow-up characteristics from the BetaGene and PIPOD studies.

|                                                               | BetaGene (n=338)   |              | PIPOD (n=97)       |              |
|---------------------------------------------------------------|--------------------|--------------|--------------------|--------------|
| Baseline Characteristics                                      |                    |              |                    |              |
|                                                               | Median or<br>N (%) | Min - Max    | Median or<br>N (%) | Min - Max    |
| Age (years)                                                   | 34                 | 18 – 66      | 39                 | 25 – 54      |
| BMI (kg/m <sup>2</sup> )                                      | 28.6               | 17.1 - 52.9  | 30.2               | 21.3 – 47.8  |
| Female (%)                                                    | 239 (71%)          | -----        | 97 (100%)          | -----        |
| OGTT status (%)                                               |                    |              |                    |              |
| Normal                                                        | 216 (64%)          | -----        | 22 (23%)           | -----        |
| Impaired                                                      | 105 (31%)          | -----        | 49 (50%)           | -----        |
| Diabetes                                                      | 17 (5%)            | ----         | 26 (27%)           | -----        |
| Fasting glucose (mmol/l)                                      | 5.1                | 3.2 – 6.6    | 5.5                | 4.5 – 10.0   |
| 2-hr glucose (mmol/l)                                         | 7.0                | 3.3 –15.1    | 9.4                | 5.4 – 19.1   |
| Fasting insulin (pmol/l)                                      | 42                 | 6 – 240      | 84                 | 30 – 300     |
| FSIGT SI<br>(min <sup>-1</sup> per µU/ml X 10 <sup>-4</sup> ) | 2.7                | 0.5 – 8.8    | 1.7                | 0 – 10.9     |
| HOMA2-%S                                                      | 128                | 10.2 – 901.7 | 61                 | 17.8 – 180.4 |
| Matsuda Index                                                 | 4.6                | 0.9 – 24.5   | 2.4                | 0.7 – 7.9    |
| Change in Insulin Sensitivity During Follow-up                |                    |              |                    |              |
|                                                               | Median             | Min - Max    | Median             | Min - Max    |
| <i>Change in original scale:</i>                              |                    |              |                    |              |
| FSIGT SI                                                      | -0.37              | -6.8 – 6.0   | 0.97               | -5.9 – 11.7  |
| HOMA2-%S                                                      | -18.7              | -678 – 888   | 21.3               | -90 - 277    |
| Matsuda Index                                                 | -0.72              | -18.2 – 20.4 | 1.22               | -2.5 – 11.2  |
| <i>Change in Standardized scale:<sup>a</sup></i>              |                    |              |                    |              |
| FSIGT SI                                                      | -0.34              | -4.6 – 3.4   | 0.55               | -1.6 – 4.8   |
| HOMA2-%S                                                      | -0.40              | -2.7 – 3.7   | 0.44               | -1.6 – 3.5   |
| Matsuda Index                                                 | -0.45              | -2.9 – 2.5   | 0.72               | -1.1 – 3.6   |

<sup>a</sup> Computed as (log(follow-up)-log(baseline))/SD of (log(follow-up)-log(baseline))
